# Supplementary material for: Metformin and statin use associate with plasma protein N-glycosylation in people with type 2 diabetes
Source: BMJ Open Diabetes Res Care. 2020 Jul 2;8(1):e001230. doi: 10.1136/bmjdrc-2020-001230 (PMC7333804; doi:10.1136/bmjdrc-2020-001230)
Supplement: Supplementary data [file bmjdrc-2020-001230supp002.xlsx]

## Sheet: Sheet1
Supplementary table 2. Derived trait description, depiction, and calculation. Within the depictions, divisions have been indicated by braces, exclusions by a cross, whereas numerical values indicate compositional limitations (i.e. 5-9 as the possible number of mannoses, 1-4 N-acetylhexosamines, or 2 fucoses). Trait abbreviations: M = mannose; Hy = hybrid species; T = within total spectrum; C = wi…
Derived trait	Description		Calculation	Relative intensity VisuCon standard plasma (N=149)
Complexity				mean	SD	RSD
MHy	The ratio of high-mannose to hybrid glycans		MHy = ( H5N2 + H6N2 + H7N2 + H8N2 + H9N2 ) / ( H5N3 + H6N3 + H5N3E1 + H6N3E1 )	3.30095	0.876689	0.265587
MM	Average number of mannoses on high mannose type glycans		MM = ( 5 * ( H5N2 ) + 6 * ( H6N2 ) + 7 * ( H7N2 ) + 8 * ( H8N2 ) + 9 * ( H9N2 ) + 10 * (0) ) / ( H5N2 + H6N2 + H7N2 + H8N2 + H9N2 )	7.82502	0.127272	0.0162648
CA2	Relative abundance of diantennary glycans within complex type glycans		CA2 = ( H3N4F1 + H4N4 + H3N5 + H4N4F1 + H5N4 + H3N5F1 + H4N5 + H5N4F1 + H4N4E1 + H4N5F1 + H5N5 + H5N4L1 + H4N4F1E1 + H5N4E1 + H5N5F1 + H4N5E1 + H5N4F1L1 + H5N4F1E1 + H4N5F1E1 + H5N5E1 + H5N4L2 + H5N4E1L1 + H5N4E2 + H5N5F1E1 + H5N4F1L2 + H5N4F1E1L1 + H5N4F1E2 + H5N5E2 + H5N5F1E1L1 + H5N5F1E2 ) / ( H3N3E1 + H3N4F1 + H4N4 + H3N5 + H3N3F1E1 + H4N3E1 + H4N4F1 + H5N4 + H3N5F1 + H4N5 + H5N4F1 + H4N4E1 +…	0.819504	0.0242682	0.0296133
CA3	Relative abundance of triantennary glycans within complex type glycans		CA3 = ( H6N5E1 + H6N5F1E1 + H6N5L2 + H6N5E1L1 + H6N5E2 + H6N5F1L2 + H6N5F1E1L1 + H6N5F1E2 + H6N5E1L2 + H6N5E2L1 + H6N5E3 + H6N5F1E1L2 + H6N5F1E2L1 + H6N5F1E3 + H6N5F2E1L2 + H6N5F2E2L1 ) / ( H3N3E1 + H3N4F1 + H4N4 + H3N5 + H3N3F1E1 + H4N3E1 + H4N4F1 + H5N4 + H3N5F1 + H4N5 + H5N4F1 + H4N4E1 + H4N5F1 + H5N5 + H5N4L1 + H4N4F1E1 + H5N4E1 + H5N5F1 + H4N5E1 + H5N4F1L1 + H5N4F1E1 + H4N5F1E1 + H5N5E1 + H5…	0.161561	0.0212542	0.131555
TA2FS0	Fucosylated, non-sialylated diantennary species within total glycans. Mostly derived from IgG (Clerc et al. 2015).		TA2FS0 = ( H3N4F1 + H4N4F1 + H3N5F1 + H5N4F1 + H4N5F1 + H5N5F1 )	0.0465967	0.0101282	0.21736
Fucosylation
A2F	Fucosylation within diantennary glycans		A2F = ( H3N4F1 + H4N4F1 + H3N5F1 + H5N4F1 + H4N5F1 + H4N4F1E1 + H5N5F1 + H5N4F1L1 + H5N4F1E1 + H4N5F1E1 + H5N5F1E1 + H5N4F1L2 + H5N4F1E1L1 + H5N4F1E2 + H5N5F1E1L1 + H5N5F1E2 ) / ( H3N4F1 + H4N4 + H3N5 + H4N4F1 + H5N4 + H3N5F1 + H4N5 + H5N4F1 + H4N4E1 + H4N5F1 + H5N5 + H5N4L1 + H4N4F1E1 + H5N4E1 + H5N5F1 + H4N5E1 + H5N4F1L1 + H5N4F1E1 + H4N5F1E1 + H5N5E1 + H5N4L2 + H5N4E1L1 + H5N4E2 + H5N5F1E1 + H…	0.192455	0.0201229	0.104559
A4F	Fucosylation within tetra-antennary glycans		A4F = ( H7N6F1E1L2 + H7N6F1E2L1 + H7N6F1E1L3 + H7N6F1E2L2 + H7N6F1E3L1 + H7N6F2E2L2 ) / ( H7N6E1L2 + H7N6E2L1 + H7N6E3 + H7N6F1E1L2 + H7N6F1E2L1 + H7N6E1L3 + H7N6E2L2 + H7N6E3L1 + H7N6F1E1L3 + H7N6F1E2L2 + H7N6F1E3L1 + H7N6F2E2L2 )	0.33962	0.0286039	0.0842233
A2S0F	Fucosylation within non-sialylated diantennary glycans		A2S0F = ( H3N4F1 + H4N4F1 + H3N5F1 + H5N4F1 + H4N5F1 + H5N5F1 ) / ( H3N4F1 + H4N4 + H3N5 + H4N4F1 + H5N4 + H3N5F1 + H4N5 + H5N4F1 + H4N5F1 + H5N5 + H5N5F1 )	0.933432	0.0131165	0.0140519
A2EF	Fucosylation within diantennary glycans with α2,6-linked sialic acid		A2EF = ( H4N4F1E1 + H5N4F1E1 + H4N5F1E1 + H5N5F1E1 + H5N4F1E1L1 + H5N4F1E2 + H5N5F1E1L1 + H5N5F1E2 ) / ( H4N4E1 + H4N4F1E1 + H5N4E1 + H4N5E1 + H5N4F1E1 + H4N5F1E1 + H5N5E1 + H5N4E1L1 + H5N4E2 + H5N5F1E1 + H5N4F1E1L1 + H5N4F1E2 + H5N5E2 + H5N5F1E1L1 + H5N5F1E2 )	0.130229	0.0121074	0.0929695
A2E0F	Fucosylation within diantennary glycans without α2,6-linked sialic acid		A2E0F = ( H3N4F1 + H4N4F1 + H3N5F1 + H5N4F1 + H4N5F1 + H5N5F1 + H5N4F1L1 + H5N4F1L2 ) / ( H3N4F1 + H4N4 + H3N5 + H4N4F1 + H5N4 + H3N5F1 + H4N5 + H5N4F1 + H4N5F1 + H5N5 + H5N4L1 + H5N5F1 + H5N4F1L1 + H5N4L2 + H5N4F1L2 )	0.887323	0.0135623	0.0152845
A2LF	Fucosylation within diantennary glycans with α2,3-linked sialic acid		A2LF = ( H5N4F1L1 + H5N4F1L2 + H5N4F1E1L1 + H5N5F1E1L1 ) / ( H5N4L1 + H5N4F1L1 + H5N4L2 + H5N4E1L1 + H5N4F1L2 + H5N4F1E1L1 + H5N5F1E1L1 )	0.313283	0.0172594	0.0550919
A2L0F	Fucosylation within diantennary glycans without α2,3-linked sialic acid		A2L0F = ( H3N4F1 + H4N4F1 + H3N5F1 + H5N4F1 + H4N5F1 + H4N4F1E1 + H5N5F1 + H5N4F1E1 + H4N5F1E1 + H5N5F1E1 + H5N4F1E2 + H5N5F1E2 ) / ( H3N4F1 + H4N4 + H3N5 + H4N4F1 + H5N4 + H3N5F1 + H4N5 + H5N4F1 + H4N4E1 + H4N5F1 + H5N5 + H4N4F1E1 + H5N4E1 + H5N5F1 + H4N5E1 + H5N4F1E1 + H4N5F1E1 + H5N5E1 + H5N4E2 + H5N5F1E1 + H5N4F1E2 + H5N5E2 + H5N5F1E2 )	0.17884	0.0211575	0.118304
A3EF	Fucosylation within triantennary glycans with α2,6-linked sialic acid		A3EF = ( H6N5F1E1 + H6N5F1E1L1 + H6N5F1E2 + H6N5F1E1L2 + H6N5F1E2L1 + H6N5F1E3 + H6N5F2E1L2 + H6N5F2E2L1 ) / ( H6N5E1 + H6N5F1E1 + H6N5E1L1 + H6N5E2 + H6N5F1E1L1 + H6N5F1E2 + H6N5E1L2 + H6N5E2L1 + H6N5E3 + H6N5F1E1L2 + H6N5F1E2L1 + H6N5F1E3 + H6N5F2E1L2 + H6N5F2E2L1 )	0.355756	0.0267377	0.0751575
A3LF	Fucosylation within triantennary glycans with α2,3-linked sialic acid		A3LF = ( H6N5F1L2 + H6N5F1E1L1 + H6N5F1E1L2 + H6N5F1E2L1 + H6N5F2E1L2 + H6N5F2E2L1 ) / ( H6N5L2 + H6N5E1L1 + H6N5F1L2 + H6N5F1E1L1 + H6N5E1L2 + H6N5E2L1 + H6N5F1E1L2 + H6N5F1E2L1 + H6N5F2E1L2 + H6N5F2E2L1 )	0.432585	0.0333711	0.0771436
A3L0F	Fucosylation within triantennary glycans without α2,3-linked sialic acid		A3L0F = ( H6N5F1E1 + H6N5F1E2 + H6N5F1E3 ) / ( H6N5E1 + H6N5F1E1 + H6N5E2 + H6N5F1E2 + H6N5E3 + H6N5F1E3 )	0.148716	0.0173313	0.11654
Bisection
A2FSB	Relative abundance of species with a bisecting GlcNAc within fucosylated sialylated diantennary glycans		A2FSB = ( H4N5F1E1 + H5N5F1E1 + H5N5F1E1L1 + H5N5F1E2 ) / ( H4N4F1E1 + H5N4F1L1 + H5N4F1E1 + H4N5F1E1 + H5N5F1E1 + H5N4F1L2 + H5N4F1E1L1 + H5N4F1E2 + H5N5F1E1L1 + H5N5F1E2 )	0.273944	0.0128002	0.0467256
A2FS0B	Relative abundance of species with a bisecting GlcNAc within fucosylated non-sialylated diantennary glycans		A2FS0B = ( H3N5F1 + H4N5F1 + H5N5F1 ) / ( H3N4F1 + H4N4F1 + H3N5F1 + H5N4F1 + H4N5F1 + H5N5F1 )	0.197561	0.0159974	0.0809747
A2F0SB	Relative abundance of species with a bisecting GlcNAc within non-fucosylated sialylated diantennary glycans		A2F0SB = ( H4N5E1 + H5N5E1 + H5N5E2 ) / ( H4N4E1 + H5N4L1 + H5N4E1 + H4N5E1 + H5N5E1 + H5N4L2 + H5N4E1L1 + H5N4E2 + H5N5E2 )	0.0120142	0.00309842	0.257895
A2F0S0B	Relative abundance of species with a bisecting GlcNAc within non-fucosylated non-sialylated diantennary glycans		A2F0S0B = ( H3N5 + H4N5 + H5N5 ) / ( H4N4 + H3N5 + H5N4 + H4N5 + H5N5 )	0.429322	0.0530854	0.123649
Galactosylation per antenna
A2FG	Galactosylation per antenna within fucosylated diantennary glycans		A2FG = ( 0/2 * ( H3N4F1 + H3N5F1 ) + 1/2 * ( H4N4F1 + H4N5F1 + H4N4F1E1 + H4N5F1E1 ) + 2/2 * ( H5N4F1 + H5N5F1 + H5N4F1L1 + H5N4F1E1 + H5N5F1E1 + H5N4F1L2 + H5N4F1E1L1 + H5N4F1E2 + H5N5F1E1L1 + H5N5F1E2 ) ) / ( H3N4F1 + H4N4F1 + H3N5F1 + H5N4F1 + H4N5F1 + H4N4F1E1 + H5N5F1 + H5N4F1L1 + H5N4F1E1 + H4N5F1E1 + H5N5F1E1 + H5N4F1L2 + H5N4F1E1L1 + H5N4F1E2 + H5N5F1E1L1 + H5N5F1E2 )	0.847561	0.0208786	0.0246337
A2F0G	Galactosylation per antenna within non-fucosylated diantennary glycans		A2F0G = ( 0/2 * ( H3N5 ) + 1/2 * ( H4N4 + H4N5 + H4N4E1 + H4N5E1 ) + 2/2 * ( H5N4 + H5N5 + H5N4L1 + H5N4E1 + H5N5E1 + H5N4L2 + H5N4E1L1 + H5N4E2 + H5N5E2 ) ) / ( H4N4 + H3N5 + H5N4 + H4N5 + H4N4E1 + H5N5 + H5N4L1 + H5N4E1 + H4N5E1 + H5N5E1 + H5N4L2 + H5N4E1L1 + H5N4E2 + H5N5E2 )	0.995594	0.0010834	0.0010882
A2SG	Galactosylation per antenna within sialylated diantennary glycans		A2SG = ( 0/2 * (0) + 1/2 * ( H4N4E1 + H4N4F1E1 + H4N5E1 + H4N5F1E1 ) + 2/2 * ( H5N4L1 + H5N4E1 + H5N4F1L1 + H5N4F1E1 + H5N5E1 + H5N4L2 + H5N4E1L1 + H5N4E2 + H5N5F1E1 + H5N4F1L2 + H5N4F1E1L1 + H5N4F1E2 + H5N5E2 + H5N5F1E1L1 + H5N5F1E2 ) ) / ( H4N4E1 + H5N4L1 + H4N4F1E1 + H5N4E1 + H4N5E1 + H5N4F1L1 + H5N4F1E1 + H4N5F1E1 + H5N5E1 + H5N4L2 + H5N4E1L1 + H5N4E2 + H5N5F1E1 + H5N4F1L2 + H5N4F1E1L1 + H5N4…	0.994122	0.00110044	0.00110694
A2FSG	Galactosylation per antenna within fucosylated sialylated diantennary glycans		A2FSG = ( 0/2 * (0) + 1/2 * ( H4N4F1E1 + H4N5F1E1 ) + 2/2 * ( H5N4F1L1 + H5N4F1E1 + H5N5F1E1 + H5N4F1L2 + H5N4F1E1L1 + H5N4F1E2 + H5N5F1E1L1 + H5N5F1E2 ) ) / ( H4N4F1E1 + H5N4F1L1 + H5N4F1E1 + H4N5F1E1 + H5N5F1E1 + H5N4F1L2 + H5N4F1E1L1 + H5N4F1E2 + H5N5F1E1L1 + H5N5F1E2 )	0.97487	0.00434153	0.00445345
A2FS0G	Galactosylation per antenna within fucosylated non-sialylated diantennary glycans		A2FS0G = ( 0/2 * ( H3N4F1 + H3N5F1 ) + 1/2 * ( H4N4F1 + H4N5F1 ) + 2/2 * ( H5N4F1 + H5N5F1 ) ) / ( H3N4F1 + H4N4F1 + H3N5F1 + H5N4F1 + H4N5F1 + H5N5F1 )	0.552518	0.0218415	0.0395308
A2F0S0G	Galactosylation per antenna within non-fucosylated, non-sialylated diantennary glycans		A2F0S0G = ( 0/2 * ( H3N5 ) + 1/2 * ( H4N4 + H4N5 ) + 2/2 * ( H5N4 + H5N5 ) ) / ( H4N4 + H3N5 + H5N4 + H4N5 + H5N5 )	0.679976	0.046564	0.0684788
Sialylation per antenna
A3S	Sialylation per antenna within triantennary glycans		A3S = ( 0/3 * (0) + 1/3 * ( H6N5E1 + H6N5F1E1 ) + 2/3 * ( H6N5L2 + H6N5E1L1 + H6N5E2 + H6N5F1L2 + H6N5F1E1L1 + H6N5F1E2 ) + 3/3 * ( H6N5E1L2 + H6N5E2L1 + H6N5E3 + H6N5F1E1L2 + H6N5F1E2L1 + H6N5F1E3 + H6N5F2E1L2 + H6N5F2E2L1 ) ) / ( H6N5E1 + H6N5F1E1 + H6N5L2 + H6N5E1L1 + H6N5E2 + H6N5F1L2 + H6N5F1E1L1 + H6N5F1E2 + H6N5E1L2 + H6N5E2L1 + H6N5E3 + H6N5F1E1L2 + H6N5F1E2L1 + H6N5F1E3 + H6N5F2E1L2 + H6…	0.926851	0.00828389	0.00893768
A4S	Sialylation per antenna within tetra-antennary glycans		A4S = ( 0/4 * (0) + 1/4 * (0) + 2/4 * (0) + 3/4 * ( H7N6E1L2 + H7N6E2L1 + H7N6E3 + H7N6F1E1L2 + H7N6F1E2L1 ) + 4/4 * ( H7N6E1L3 + H7N6E2L2 + H7N6E3L1 + H7N6F1E1L3 + H7N6F1E2L2 + H7N6F1E3L1 + H7N6F2E2L2 ) ) / ( H7N6E1L2 + H7N6E2L1 + H7N6E3 + H7N6F1E1L2 + H7N6F1E2L1 + H7N6E1L3 + H7N6E2L2 + H7N6E3L1 + H7N6F1E1L3 + H7N6F1E2L2 + H7N6F1E3L1 + H7N6F2E2L2 )	0.898342	0.0063309	0.00704731
Sialylation per galactose
A2GS	Sialylation per galactose within diantennary glycans		A2GS = ( ( 0/2 * ( H3N4F1 + H4N4 + H3N5 + H4N4F1 + H5N4 + H3N5F1 + H4N5 + H5N4F1 + H4N5F1 + H5N5 + H5N5F1 ) + 1/2 * ( H4N4E1 + H5N4L1 + H4N4F1E1 + H5N4E1 + H4N5E1 + H5N4F1L1 + H5N4F1E1 + H4N5F1E1 + H5N5E1 + H5N5F1E1 ) + 2/2 * ( H5N4L2 + H5N4E1L1 + H5N4E2 + H5N4F1L2 + H5N4F1E1L1 + H5N4F1E2 + H5N5E2 + H5N5F1E1L1 + H5N5F1E2 ) ) / ( H3N4F1 + H4N4 + H3N5 + H4N4F1 + H5N4 + H3N5F1 + H4N5 + H5N4F1 + H4N4…	0.892414	0.0143678	0.0160999
A2FGS	Sialylation per galactose within fucosylated diantennary glycans		A2FGS = ( ( 0/2 * ( H3N4F1 + H4N4F1 + H3N5F1 + H5N4F1 + H4N5F1 + H5N5F1 ) + 1/2 * ( H4N4F1E1 + H5N4F1L1 + H5N4F1E1 + H4N5F1E1 + H5N5F1E1 ) + 2/2 * ( H5N4F1L2 + H5N4F1E1L1 + H5N4F1E2 + H5N5F1E1L1 + H5N5F1E2 ) ) / ( H3N4F1 + H4N4F1 + H3N5F1 + H5N4F1 + H4N5F1 + H4N4F1E1 + H5N5F1 + H5N4F1L1 + H5N4F1E1 + H4N5F1E1 + H5N5F1E1 + H5N4F1L2 + H5N4F1E1L1 + H5N4F1E2 + H5N5F1E1L1 + H5N5F1E2 ) ) / ( ( 0/2 * ( H…	0.668061	0.0340234	0.0509285
A2F0GS	Sialylation per galactose within non-fucosylated diantennary glycans		A2F0GS = ( ( 0/2 * ( H4N4 + H3N5 + H5N4 + H4N5 + H5N5 ) + 1/2 * ( H4N4E1 + H5N4L1 + H5N4E1 + H4N5E1 + H5N5E1 ) + 2/2 * ( H5N4L2 + H5N4E1L1 + H5N4E2 + H5N5E2 ) ) / ( H4N4 + H3N5 + H5N4 + H4N5 + H4N4E1 + H5N5 + H5N4L1 + H5N4E1 + H4N5E1 + H5N5E1 + H5N4L2 + H5N4E1L1 + H5N4E2 + H5N5E2 ) ) / ( ( 0/2 * ( H3N5 ) + 1/2 * ( H4N4 + H4N5 + H4N4E1 + H4N5E1 ) + 2/2 * ( H5N4 + H5N5 + H5N4L1 + H5N4E1 + H5N5E1 + …	0.938303	0.00617821	0.00658445
A4FGS	Sialylation per galactose within fucosylated tetra-antennary glycans		A4FGS = ( ( 0/4 * (0) + 1/4 * (0) + 2/4 * (0) + 3/4 * ( H7N6F1E1L2 + H7N6F1E2L1 ) + 4/4 * ( H7N6F1E1L3 + H7N6F1E2L2 + H7N6F1E3L1 + H7N6F2E2L2 ) ) / ( H7N6E1L2 + H7N6E2L1 + H7N6E3 + H7N6F1E1L2 + H7N6F1E2L1 + H7N6E1L3 + H7N6E2L2 + H7N6E3L1 + H7N6F1E1L3 + H7N6F1E2L2 + H7N6F1E3L1 + H7N6F2E2L2 ) ) / ( ( 0/4 * (0) + 1/4 * (0) + 2/4 * (0) + 3/4 * (0) + 4/4 * ( H7N6F1E1L2 + H7N6F1E2L1 + H7N6F1E1L3 + H7N6…	0.908371	0.00908034	0.00999628
α2,3-sialylation per antenna
A2L	α2,3-sialylation per antenna within diantennary glycans		A2L = ( 0/2 * ( H3N4F1 + H4N4 + H3N5 + H4N4F1 + H5N4 + H3N5F1 + H4N5 + H5N4F1 + H4N4E1 + H4N5F1 + H5N5 + H4N4F1E1 + H5N4E1 + H5N5F1 + H4N5E1 + H5N4F1E1 + H4N5F1E1 + H5N5E1 + H5N4E2 + H5N5F1E1 + H5N4F1E2 + H5N5E2 + H5N5F1E2 ) + 1/2 * ( H5N4L1 + H5N4F1L1 + H5N4E1L1 + H5N4F1E1L1 + H5N5F1E1L1 ) + 2/2 * ( H5N4L2 + H5N4F1L2 ) ) / ( H3N4F1 + H4N4 + H3N5 + H4N4F1 + H5N4 + H3N5F1 + H4N5 + H5N4F1 + H4N4E1 …	0.0567824	0.00437314	0.0770158
A3L	α2,3-sialylation per antenna within triantennary glycans		A3L = ( 0/3 * ( H6N5E1 + H6N5F1E1 + H6N5E2 + H6N5F1E2 + H6N5E3 + H6N5F1E3 ) + 1/3 * ( H6N5E1L1 + H6N5F1E1L1 + H6N5E2L1 + H6N5F1E2L1 + H6N5F2E2L1 ) + 2/3 * ( H6N5L2 + H6N5F1L2 + H6N5E1L2 + H6N5F1E1L2 + H6N5F2E1L2 ) + 3/3 * (0) ) / ( H6N5E1 + H6N5F1E1 + H6N5L2 + H6N5E1L1 + H6N5E2 + H6N5F1L2 + H6N5F1E1L1 + H6N5F1E2 + H6N5E1L2 + H6N5E2L1 + H6N5E3 + H6N5F1E1L2 + H6N5F1E2L1 + H6N5F1E3 + H6N5F2E1L2 + H6…	0.27786	0.00516184	0.0185772
A4L	α2,3-sialylation per antenna within tetra-antennary glycans		A4L = ( 0/4 * ( H7N6E3 ) + 1/4 * ( H7N6E2L1 + H7N6F1E2L1 + H7N6E3L1 + H7N6F1E3L1 ) + 2/4 * ( H7N6E1L2 + H7N6F1E1L2 + H7N6E2L2 + H7N6F1E2L2 + H7N6F2E2L2 ) + 3/4 * ( H7N6E1L3 + H7N6F1E1L3 ) + 4/4 * (0) ) / ( H7N6E1L2 + H7N6E2L1 + H7N6E3 + H7N6F1E1L2 + H7N6F1E2L1 + H7N6E1L3 + H7N6E2L2 + H7N6E3L1 + H7N6F1E1L3 + H7N6F1E2L2 + H7N6F1E3L1 + H7N6F2E2L2 )	0.4712	0.0102675	0.0217902
α2,6-sialylation per antenna
A2E	α2,6-sialylation per antenna within diantennary glycans		A2E = ( 0/2 * ( H3N4F1 + H4N4 + H3N5 + H4N4F1 + H5N4 + H3N5F1 + H4N5 + H5N4F1 + H4N5F1 + H5N5 + H5N4L1 + H5N5F1 + H5N4F1L1 + H5N4L2 + H5N4F1L2 ) + 1/2 * ( H4N4E1 + H4N4F1E1 + H5N4E1 + H4N5E1 + H5N4F1E1 + H4N5F1E1 + H5N5E1 + H5N4E1L1 + H5N5F1E1 + H5N4F1E1L1 + H5N5F1E1L1 ) + 2/2 * ( H5N4E2 + H5N4F1E2 + H5N5E2 + H5N5F1E2 ) ) / ( H3N4F1 + H4N4 + H3N5 + H4N4F1 + H5N4 + H3N5F1 + H4N5 + H5N4F1 + H4N4E1 …	0.806207	0.0199526	0.0247488
A3E	α2,6-sialylation per antenna within triantennary glycans		A3E = ( 0/3 * ( H6N5L2 + H6N5F1L2 ) + 1/3 * ( H6N5E1 + H6N5F1E1 + H6N5E1L1 + H6N5F1E1L1 + H6N5E1L2 + H6N5F1E1L2 + H6N5F2E1L2 ) + 2/3 * ( H6N5E2 + H6N5F1E2 + H6N5E2L1 + H6N5F1E2L1 + H6N5F2E2L1 ) + 3/3 * ( H6N5E3 + H6N5F1E3 ) ) / ( H6N5E1 + H6N5F1E1 + H6N5L2 + H6N5E1L1 + H6N5E2 + H6N5F1L2 + H6N5F1E1L1 + H6N5F1E2 + H6N5E1L2 + H6N5E2L1 + H6N5E3 + H6N5F1E1L2 + H6N5F1E2L1 + H6N5F1E3 + H6N5F2E1L2 + H6N5…	0.648999	0.00722496	0.0111325
A4E	α2,6-sialylation per antenna within tetra-antennary glycans		A4E = ( 0/4 * (0) + 1/4 * ( H7N6E1L2 + H7N6F1E1L2 + H7N6E1L3 + H7N6F1E1L3 ) + 2/4 * ( H7N6E2L1 + H7N6F1E2L1 + H7N6E2L2 + H7N6F1E2L2 + H7N6F2E2L2 ) + 3/4 * ( H7N6E3 + H7N6E3L1 + H7N6F1E3L1 ) + 4/4 * (0) ) / ( H7N6E1L2 + H7N6E2L1 + H7N6E3 + H7N6F1E1L2 + H7N6F1E2L1 + H7N6E1L3 + H7N6E2L2 + H7N6E3L1 + H7N6F1E1L3 + H7N6F1E2L2 + H7N6F1E3L1 + H7N6F2E2L2 )	0.427241	0.00823328	0.0192708
α2,3-sialylation per galactose
A2FGL	α2,3-sialylation per galactose within fucosylated diantennary glycans		A2FGL = ( ( 0/2 * ( H3N4F1 + H4N4F1 + H3N5F1 + H5N4F1 + H4N5F1 + H4N4F1E1 + H5N5F1 + H5N4F1E1 + H4N5F1E1 + H5N5F1E1 + H5N4F1E2 + H5N5F1E2 ) + 1/2 * ( H5N4F1L1 + H5N4F1E1L1 + H5N5F1E1L1 ) + 2/2 * ( H5N4F1L2 ) ) / ( H3N4F1 + H4N4F1 + H3N5F1 + H5N4F1 + H4N5F1 + H4N4F1E1 + H5N5F1 + H5N4F1L1 + H5N4F1E1 + H4N5F1E1 + H5N5F1E1 + H5N4F1L2 + H5N4F1E1L1 + H5N4F1E2 + H5N5F1E1L1 + H5N5F1E2 ) ) / ( ( 0/2 * ( H…	0.127761	0.0100733	0.0788448
A2F0GL	α2,3-sialylation per galactose within non-fucosylated diantennary glycans		A2F0GL = ( ( 0/2 * ( H4N4 + H3N5 + H5N4 + H4N5 + H4N4E1 + H5N5 + H5N4E1 + H4N5E1 + H5N5E1 + H5N4E2 + H5N5E2 ) + 1/2 * ( H5N4L1 + H5N4E1L1 ) + 2/2 * ( H5N4L2 ) ) / ( H4N4 + H3N5 + H5N4 + H4N5 + H4N4E1 + H5N5 + H5N4L1 + H5N4E1 + H4N5E1 + H5N5E1 + H5N4L2 + H5N4E1L1 + H5N4E2 + H5N5E2 ) ) / ( ( 0/2 * ( H3N5 ) + 1/2 * ( H4N4 + H4N5 + H4N4E1 + H4N5E1 ) + 2/2 * ( H5N4 + H5N5 + H5N4L1 + H5N4E1 + H5N5E1 + …	0.04453	0.00386073	0.0866995
A4FGL	α2,3-sialylation per galactose within fucosylated tetra-antennary glycans		A4FGL = ( ( 0/4 * (0) + 1/4 * ( H7N6F1E2L1 + H7N6F1E3L1 ) + 2/4 * ( H7N6F1E1L2 + H7N6F1E2L2 + H7N6F2E2L2 ) + 3/4 * ( H7N6F1E1L3 ) + 4/4 * (0) ) / ( H7N6E1L2 + H7N6E2L1 + H7N6E3 + H7N6F1E1L2 + H7N6F1E2L1 + H7N6E1L3 + H7N6E2L2 + H7N6E3L1 + H7N6F1E1L3 + H7N6F1E2L2 + H7N6F1E3L1 + H7N6F2E2L2 ) ) / ( ( 0/4 * (0) + 1/4 * (0) + 2/4 * (0) + 3/4 * (0) + 4/4 * ( H7N6F1E1L2 + H7N6F1E2L1 + H7N6F1E1L3 + H7N6F1…	0.486935	0.0142415	0.0292473
A4F0GL	α2,3-sialylation per galactose within non-fucosylated tetra-antennary glycans		A4F0GL = ( ( 0/4 * ( H7N6E3 ) + 1/4 * ( H7N6E2L1 + H7N6E3L1 ) + 2/4 * ( H7N6E1L2 + H7N6E2L2 ) + 3/4 * ( H7N6E1L3 ) + 4/4 * (0) ) / ( H7N6E1L2 + H7N6E2L1 + H7N6E3 + H7N6F1E1L2 + H7N6F1E2L1 + H7N6E1L3 + H7N6E2L2 + H7N6E3L1 + H7N6F1E1L3 + H7N6F1E2L2 + H7N6F1E3L1 + H7N6F2E2L2 ) ) / ( ( 0/4 * (0) + 1/4 * (0) + 2/4 * (0) + 3/4 * (0) + 4/4 * ( H7N6E1L2 + H7N6E2L1 + H7N6E3 + H7N6E1L3 + H7N6E2L2 + H7N6E3L…	0.462856	0.0119547	0.0258281
α2,6-sialylation per galactose
A2FGE	α2,6-sialylation per galactose within fucosylated diantennary glycans		A2FGE = ( ( 0/2 * ( H3N4F1 + H4N4F1 + H3N5F1 + H5N4F1 + H4N5F1 + H5N5F1 + H5N4F1L1 + H5N4F1L2 ) + 1/2 * ( H4N4F1E1 + H5N4F1E1 + H4N5F1E1 + H5N5F1E1 + H5N4F1E1L1 + H5N5F1E1L1 ) + 2/2 * ( H5N4F1E2 + H5N5F1E2 ) ) / ( H3N4F1 + H4N4F1 + H3N5F1 + H5N4F1 + H4N5F1 + H4N4F1E1 + H5N5F1 + H5N4F1L1 + H5N4F1E1 + H4N5F1E1 + H5N5F1E1 + H5N4F1L2 + H5N4F1E1L1 + H5N4F1E2 + H5N5F1E1L1 + H5N5F1E2 ) ) / ( ( 0/2 * ( H…	0.537545	0.0268704	0.0499872
A2F0GE	α2,6-sialylation per galactose within non-fucosylated diantennary glycans		A2F0GE = ( ( 0/2 * ( H4N4 + H3N5 + H5N4 + H4N5 + H5N5 + H5N4L1 + H5N4L2 ) + 1/2 * ( H4N4E1 + H5N4E1 + H4N5E1 + H5N5E1 + H5N4E1L1 ) + 2/2 * ( H5N4E2 + H5N5E2 ) ) / ( H4N4 + H3N5 + H5N4 + H4N5 + H4N4E1 + H5N5 + H5N4L1 + H5N4E1 + H4N5E1 + H5N5E1 + H5N4L2 + H5N4E1L1 + H5N4E2 + H5N5E2 ) ) / ( ( 0/2 * ( H3N5 ) + 1/2 * ( H4N4 + H4N5 + H4N4E1 + H4N5E1 ) + 2/2 * ( H5N4 + H5N5 + H5N4L1 + H5N4E1 + H5N5E1 + …	0.893674	0.00846925	0.00947689
A4FGE	α2,6-sialylation per galactose within fucosylated tetra-antennary glycans		A4FGE = ( ( 0/4 * (0) + 1/4 * ( H7N6F1E1L2 + H7N6F1E1L3 ) + 2/4 * ( H7N6F1E2L1 + H7N6F1E2L2 + H7N6F2E2L2 ) + 3/4 * ( H7N6F1E3L1 ) + 4/4 * (0) ) / ( H7N6E1L2 + H7N6E2L1 + H7N6E3 + H7N6F1E1L2 + H7N6F1E2L1 + H7N6E1L3 + H7N6E2L2 + H7N6E3L1 + H7N6F1E1L3 + H7N6F1E2L2 + H7N6F1E3L1 + H7N6F2E2L2 ) ) / ( ( 0/4 * (0) + 1/4 * (0) + 2/4 * (0) + 3/4 * (0) + 4/4 * ( H7N6F1E1L2 + H7N6F1E2L1 + H7N6F1E1L3 + H7N6F1…	0.421583	0.0113983	0.0270369
A4F0GE	α2,6-sialylation per galactose within non-fucosylated tetra-antennary glycans		A4F0GE = ( ( 0/4 * (0) + 1/4 * ( H7N6E1L2 + H7N6E1L3 ) + 2/4 * ( H7N6E2L1 + H7N6E2L2 ) + 3/4 * ( H7N6E3 + H7N6E3L1 ) + 4/4 * (0) ) / ( H7N6E1L2 + H7N6E2L1 + H7N6E3 + H7N6F1E1L2 + H7N6F1E2L1 + H7N6E1L3 + H7N6E2L2 + H7N6E3L1 + H7N6F1E1L3 + H7N6F1E2L2 + H7N6F1E3L1 + H7N6F2E2L2 ) ) / ( ( 0/4 * (0) + 1/4 * (0) + 2/4 * (0) + 3/4 * (0) + 4/4 * ( H7N6E1L2 + H7N6E2L1 + H7N6E3 + H7N6E1L3 + H7N6E2L2 + H7N6E…	0.430504	0.0102647	0.0238436
