# Supplementary material for: Metformin and statin use associate with plasma protein N-glycosylation in people with type 2 diabetes
Source: BMJ Open Diabetes Res Care. 2020 Jul 2;8(1):e001230. doi: 10.1136/bmjdrc-2020-001230 (PMC7333804; doi:10.1136/bmjdrc-2020-001230)
Supplement: Supplementary data [file bmjdrc-2020-001230supp007.xlsx]

## Sheet: Sheet1
Supplementary table 7. Associations between derived glycan traits and ACE inhibitors/ARB use in type 2 diabetes. Glycan values are centered and scaled. Shown are regression coefficient beta, standard error (SE), p-value and the adjusted p-value after multiple comparison correction The adjusted p-values that remained significant after correction for multiple comparisons are highlighted in green. R…
ACE inhibitors/ARB
Basic model					Full model					Adjustment for metformin and statin					Adjustment statin and metformin use & their interaction					Not using metformin and statins
Users (n)	1282				Users (n)	1268				Users (n)	1268				Users (n)	1268				Users (n)	102
Non-users (n)	1459				Non-users (n)	1434				Non-users (n)	1434				Non-users (n)	1434				Non-users (n)	263
glycan trait	beta	SE	p-value	adjusted pvalue	glycan trait	beta	SE	p-value	adjusted pvalue	glycan trait	beta	SE	p-value	adjusted pvalue	glycan trait2	beta	SE	p-value	adjusted pvalue	glycan trait5	beta	SE	p-value	adjusted pvalue
A2E	0.175044	0.0883743	0.047624	0.0824261	A2E	0.124048	0.0707025	0.0793444	0.208122	A2E	0.0933363	0.0433148	0.0311748	0.155874	A2E	0.0931411	0.0447106	0.0372331	0.167549	A2E	0.107586	0.130267	0.40887	0.901786
A2E0F	-0.125617	0.03611	0.000503809	0.00453428	A2E0F	-0.106469	0.0406793	0.00886347	0.0681317	A2E0F	-0.0837581	0.0411367	0.0417413	0.171248	A2E0F	-0.0860102	0.0412143	0.0368969	0.167549	A2E0F	0.0508021	0.124262	0.682665	0.901786
A2EF	-0.170179	0.0558793	0.00232321	0.00963473	A2EF	-0.171977	0.0497183	0.000542152	0.0121984	A2EF	-0.128385	0.0412052	0.00183474	0.0473822	A2EF	-0.127639	0.041269	0.00198246	0.045738	A2EF	-0.160812	0.138803	0.246636	0.901786
A2F	-0.185909	0.0756003	0.0139287	0.041786	A2F	-0.171683	0.0671944	0.0106184	0.0682609	A2F	-0.124322	0.0407229	0.00226654	0.0473822	A2F	-0.124057	0.0408011	0.0023615	0.045738	A2F	-0.113781	0.132242	0.389571	0.901786
A2F0G	0.107957	0.079799	0.176102	0.246386	A2F0G	0.1125	0.101964	0.269886	0.503648	A2F0G	0.0795124	0.0743608	0.284944	0.512899	A2F0G	0.0780271	0.0751729	0.299285	0.554503	A2F0G	0.25306	0.202426	0.211251	0.901786
A2F0GE	0.0777435	0.0634673	0.220599	0.287465	A2F0GE	0.0311139	0.0480193	0.51702	0.750513	A2F0GE	0.031864	0.0474304	0.501707	0.751394	A2F0GE	0.0297741	0.0501823	0.552968	0.791379	A2F0GE	0.13247	0.130585	0.310376	0.901786
A2F0GL	-0.0654501	0.071768	0.361786	0.42843	A2F0GL	0.00442423	0.0400895	0.912125	0.954047	A2F0GL	-0.00796679	0.0406842	0.844751	0.897774	A2F0GL	-0.00493339	0.0407566	0.903655	0.924193	A2F0GL	0.0536442	0.258346	0.835506	0.963219
A2F0GS	0.0554885	0.0414509	0.180683	0.246386	A2F0GS	0.0355326	0.046351	0.443321	0.703007	A2F0GS	0.0276956	0.0413861	0.503368	0.751394	A2F0GS	0.0266164	0.0439306	0.544599	0.791379	A2F0GS	0.113368	0.134499	0.399291	0.901786
A2F0S0B	0.0519044	0.0829446	0.531465	0.597898	A2F0S0B	0.00158239	0.0525145	0.975961	0.975961	A2F0S0B	-0.00626154	0.0407309	0.877823	0.897774	A2F0S0B	-0.00674844	0.0407998	0.868626	0.91077	A2F0S0B	-0.0893056	0.12726	0.48283	0.901786
A2F0S0G	0.00449993	0.0359321	0.900338	0.911319	A2F0S0G	0.0330571	0.0401481	0.410293	0.703007	A2F0S0G	0.0347871	0.0407573	0.393373	0.655621	A2F0S0G	0.0355187	0.0408307	0.384354	0.64059	A2F0S0G	0.281442	0.199569	0.158466	0.901786
A2F0SB	-0.0458549	0.056082	0.413563	0.477188	A2F0SB	-0.0525086	0.0670094	0.433275	0.703007	A2F0SB	-0.0244939	0.0502215	0.62575	0.775788	A2F0SB	-0.0212218	0.0506449	0.675193	0.821181	A2F0SB	-0.111938	0.151286	0.459353	0.901786
A2FG	0.0126792	0.0347099	0.714895	0.765959	A2FG	-0.00526916	0.0390554	0.892679	0.954047	A2FG	-0.0111249	0.0396158	0.778848	0.876204	A2FG	-0.00978039	0.0396877	0.805347	0.894049	A2FG	0.0490143	0.130077	0.706315	0.901786
A2FGE	0.0697634	0.0761965	0.359892	0.42843	A2FGE	-0.00692742	0.063703	0.913404	0.954047	A2FGE	-0.0138082	0.0475021	0.771292	0.876204	A2FGE	-0.0121363	0.0508604	0.8114	0.894049	A2FGE	-0.179416	0.124468	0.149453	0.901786
A2FGL	0.0809441	0.0351911	0.0214407	0.0507807	A2FGL	0.0657002	0.0390889	0.0928035	0.208808	A2FGL	0.0515181	0.0396948	0.194337	0.423782	A2FGL	0.0508812	0.0397747	0.200814	0.430316	A2FGL	0.152273	0.123439	0.217356	0.901786
A2FGS	0.106321	0.0873598	0.223584	0.287465	A2FGS	0.025357	0.0659475	0.700605	0.896722	A2FGS	0.010155	0.0443404	0.818851	0.897774	A2FGS	0.0110842	0.0472625	0.814578	0.894049	A2FGS	-0.0925804	0.126807	0.465334	0.901786
A2FS0B	0.0868586	0.045031	0.0537479	0.0863806	A2FS0B	0.0115881	0.0389727	0.766207	0.916569	A2FS0B	-0.013345	0.0391723	0.733348	0.868438	A2FS0B	-0.0128681	0.0392524	0.743041	0.879917	A2FS0B	-0.0509155	0.112243	0.650103	0.901786
A2FS0G	-0.0628251	0.0321627	0.0507779	0.0846299	A2FS0G	-0.0265963	0.0354456	0.453049	0.703007	A2FS0G	-0.0292717	0.0414524	0.480093	0.751394	A2FS0G	-0.0281981	0.043064	0.5126	0.791379	A2FS0G	0.194346	0.139627	0.163952	0.901786
A2FSB	-0.0832152	0.0357409	0.0198966	0.050596	A2FSB	-0.0700191	0.0401175	0.0809236	0.208122	A2FSB	-0.0523536	0.0406489	0.197765	0.423782	A2FSB	-0.0544038	0.040711	0.181438	0.408235	A2FSB	-0.259155	0.131663	0.0490323	0.735485
A2FSG	-0.0185342	0.0357243	0.603892	0.662809	A2FSG	-0.0462517	0.0401893	0.249795	0.488729	A2FSG	-0.0477884	0.040821	0.241727	0.494442	A2FSG	-0.0466719	0.0409041	0.253867	0.496696	A2FSG	0.0194488	0.131727	0.882623	0.968733
A2GS	0.159757	0.0846773	0.059206	0.0918713	A2GS	0.106308	0.0730347	0.145507	0.297627	A2GS	0.0768582	0.0503035	0.12654	0.33496	A2GS	0.0760865	0.0524236	0.146674	0.347387	A2GS	0.0911976	0.136515	0.504107	0.901786
A2L	-0.0590735	0.0528688	0.26384	0.3298	A2L	-0.014277	0.039443	0.717378	0.896722	A2L	-0.024835	0.0424425	0.558449	0.76428	A2L	-0.0235951	0.0436963	0.589211	0.791379	A2L	0.113874	0.236529	0.630205	0.901786
A2L0F	-0.178964	0.0735012	0.0148982	0.0419011	A2L0F	-0.160261	0.0614293	0.00908423	0.0681317	A2L0F	-0.116904	0.040849	0.00421175	0.0473822	A2L0F	-0.116359	0.040927	0.00446794	0.0502643	A2L0F	-0.124653	0.133281	0.349649	0.901786
A2LF	-0.0689265	0.0347708	0.0474447	0.0824261	A2LF	-0.120151	0.0568764	0.0346438	0.129914	A2LF	-0.0757386	0.0397101	0.0564836	0.19552	A2LF	-0.0787908	0.0397788	0.0476225	0.187863	A2LF	-0.0272334	0.128669	0.832377	0.963219
A2S0F	-0.091044	0.036315	0.012174	0.0391306	A2S0F	-0.0779081	0.0411179	0.0581253	0.182152	A2S0F	-0.0744528	0.0417065	0.0742353	0.238613	A2S0F	-0.0756102	0.0417838	0.0703641	0.22617	A2S0F	0.0773131	0.125147	0.536721	0.901786
A2SG	0.132256	0.0434857	0.00235516	0.00963473	A2SG	0.125875	0.052495	0.0164915	0.0809422	A2SG	0.0891252	0.0409508	0.0295255	0.155874	A2SG	0.0894398	0.0410353	0.0292884	0.164747	A2SG	0.214503	0.135994	0.114729	0.901786
A3E	0.15932	0.0374914	2.14238e-05	0.000482036	A3E	0.0653248	0.038275	0.0878738	0.208122	A3E	0.0788517	0.0389011	0.0426646	0.171248	A3E	0.0763451	0.0389688	0.0500968	0.187863	A3E	-0.0436305	0.122369	0.721429	0.901786
A3EF	-0.0723224	0.0344889	0.0359957	0.0727581	A3EF	-0.0919268	0.0388552	0.0179872	0.0809422	A3EF	-0.0555018	0.0391962	0.156775	0.371309	A3EF	-0.0596318	0.0392533	0.128723	0.340738	A3EF	0.0225355	0.124354	0.856194	0.963219
A3L	-0.115442	0.0363289	0.00148451	0.00954326	A3L	-0.00883696	0.0427173	0.836111	0.940625	A3L	-0.0186781	0.0396833	0.63787	0.775788	A3L	-0.018497	0.039764	0.641811	0.802264	A3L	0.143618	0.12048	0.23324	0.901786
A3L0F	-0.167806	0.0347248	1.34853e-06	6.0684e-05	A3L0F	-0.162057	0.0390569	3.33547e-05	0.00150096	A3L0F	-0.114272	0.0391014	0.00347278	0.0473822	A3L0F	-0.11606	0.0391733	0.0030492	0.045738	A3L0F	-0.0498939	0.133544	0.708691	0.901786
A3LF	-0.0485946	0.0346093	0.160293	0.232683	A3LF	-0.0797606	0.0389773	0.0407236	0.140966	A3LF	-0.0441426	0.0393368	0.261789	0.512196	A3LF	-0.0482819	0.0393942	0.220345	0.450705	A3LF	0.00780178	0.12445	0.950013	0.98374
A3S	0.00655916	0.0363275	0.856716	0.896563	A3S	0.0444256	0.0411059	0.279805	0.503648	A3S	0.0455667	0.0417836	0.275475	0.512899	A3S	0.0426667	0.0418586	0.308057	0.554503	A3S	0.0988676	0.135997	0.467235	0.901786
A4E	0.0840917	0.0362168	0.0202384	0.050596	A4E	-0.0152755	0.0599923	0.799013	0.921938	A4E	-0.00084649	0.0402636	0.983227	0.983227	A4E	0.000230373	0.0403384	0.995443	0.995443	A4E	-0.0781634	0.133861	0.559277	0.901786
A4F	-0.0717286	0.0344237	0.0371875	0.0727581	A4F	-0.096616	0.038897	0.0129955	0.0730994	A4F	-0.0644873	0.0392805	0.10065	0.301949	A4F	-0.0687154	0.039337	0.0806653	0.241996	A4F	0.000457301	0.127254	0.997133	0.997133
A4F0GE	0.0720957	0.0362212	0.0465442	0.0824261	A4F0GE	-0.031809	0.0532436	0.550224	0.773753	A4F0GE	-0.0236047	0.0405481	0.560472	0.76428	A4F0GE	-0.0217608	0.0406232	0.592184	0.791379	A4F0GE	-0.0631537	0.174615	0.717595	0.901786
A4F0GL	-0.0986592	0.0364491	0.00679423	0.0235185	A4F0GL	0.0125301	0.0436351	0.773992	0.916569	A4F0GL	0.00683177	0.0400166	0.864441	0.897774	A4F0GL	0.006547	0.0400948	0.870292	0.91077	A4F0GL	0.115819	0.118835	0.329747	0.901786
A4FGE	0.0600252	0.0363479	0.098655	0.147983	A4FGE	-0.00464742	0.0551523	0.932846	0.954047	A4FGE	0.0222911	0.0408152	0.584964	0.774217	A4FGE	0.0215687	0.0408979	0.597931	0.791379	A4FGE	-0.0892572	0.127802	0.484926	0.901786
A4FGL	-0.104626	0.0364294	0.00407854	0.0152945	A4FGL	-0.027127	0.0567859	0.632859	0.862989	A4FGL	-0.042092	0.0466653	0.367058	0.635293	A4FGL	-0.042727	0.0454222	0.346878	0.600365	A4FGL	0.068981	0.128908	0.592569	0.901786
A4FGS	-0.123522	0.0360668	0.000615248	0.00461436	A4FGS	-0.0756174	0.0403175	0.0607172	0.182152	A4FGS	-0.0646602	0.0409418	0.114262	0.321363	A4FGS	-0.0659566	0.041022	0.107872	0.303389	A4FGS	-0.00634411	0.132734	0.961879	0.98374
A4L	-0.131291	0.0362485	0.000292367	0.00328912	A4L	-0.021571	0.056678	0.703509	0.896722	A4L	-0.0281092	0.0434449	0.517627	0.751394	A4L	-0.0294295	0.0425054	0.488705	0.785418	A4L	0.0890893	0.117203	0.447179	0.901786
A4S	-0.132599	0.0361269	0.000242194	0.00328912	A4S	-0.0692064	0.040293	0.0858733	0.208122	A4S	-0.0597689	0.0409135	0.144053	0.360134	A4S	-0.0599122	0.0409981	0.143922	0.347387	A4S	-0.00707859	0.125862	0.95515	0.98374
CA2	-0.134752	0.0435956	0.0019951	0.00963473	CA2	-0.120626	0.0394881	0.00225255	0.0337883	CA2	-0.107755	0.0398598	0.00686453	0.0617808	CA2	-0.105369	0.0399338	0.00832514	0.0749262	CA2	-0.0828216	0.182239	0.649493	0.901786
CA3	0.13077	0.0429557	0.00233214	0.00963473	CA3	0.110491	0.039432	0.0050776	0.057123	CA3	0.096585	0.0397372	0.0150741	0.113056	CA3	0.0948063	0.0398134	0.0172534	0.129401	CA3	0.0575418	0.189057	0.760852	0.92536
MHy	0.00452897	0.0406644	0.911319	0.911319	MHy	0.0629577	0.0878791	0.473736	0.710604	MHy	0.0406311	0.079219	0.608024	0.775788	MHy	0.0387391	0.079303	0.6252	0.802264	MHy	0.275831	0.114265	0.0157805	0.355062
MM	0.104133	0.0477488	0.0291944	0.0625593	MM	0.122782	0.0749791	0.101515	0.217533	MM	0.105749	0.0529149	0.0456662	0.171248	MM	0.100907	0.0545077	0.0641333	0.222	MM	0.348954	0.129102	0.00687331	0.309299
TA2FS0	-0.16035	0.071139	0.024194	0.0544365	TA2FS0	-0.123491	0.0548358	0.0243213	0.0994961	TA2FS0	-0.0901689	0.039657	0.0229828	0.147746	TA2FS0	-0.0902864	0.0397377	0.0230829	0.14839	TA2FS0	-0.0547724	0.129404	0.672101	0.901786
